# Supplementary material
Source: HighWire-hosted journal article supplement (https://bmjopen.bmj.com/content/15/4/e087402)
Supplement: inline-supplementary-material-3 [file inline-supplementary-material-3.pdf]

**Table S3. Attitude Dimension, %**

| <b>Items</b>                                                                                                                                                      | <b>Strongly Agree</b> | <b>Agree</b> | <b>Neutral</b> | <b>Disagree</b> | <b>Strongly Disagree</b> |
|-------------------------------------------------------------------------------------------------------------------------------------------------------------------|-----------------------|--------------|----------------|-----------------|--------------------------|
| A1. I consider ankle sprains to be minor injuries, so I don't pay much attention to them.                                                                         | 7.26                  | 7.82         | 28.49          | 36.69           | 19.74                    |
| A2. I believe that Osteochondral Lesions of the Talus can heal on their own.                                                                                      | 5.03                  | 13.59        | 37.62          | 30.17           | 13.59                    |
| A3. I think that after an ankle injury, self-medication can accelerate recovery, and there is no need to go to the hospital.                                      | 4.84                  | 8.01         | 31.47          | 36.87           | 18.81                    |
| A4. I believe that after an ankle injury, massage can improve blood circulation.                                                                                  | 11.17                 | 24.21        | 32.77          | 21.04           | 10.80                    |
| A5. I think that the cost of examinations like magnetic resonance imaging (MRI) for Osteochondral Lesions of the Talus is too expensive.                          | 12.66                 | 22.91        | 39.85          | 15.08           | 9.50                     |
| A6. I think that surgery for Osteochondral Lesions of the Talus carries too much risk, and conservative treatment is better.                                      | 5.40                  | 17.50        | 51.21          | 16.01           | 9.87                     |
| A7. Minimally invasive arthroscopic treatment has minimal trauma and low risk, and I am more accepting of it.                                                     | 9.31                  | 29.05        | 45.25          | 9.50            | 6.89                     |
| A8. I believe that ankle sprains should not be taken lightly, and it is necessary to go to the hospital to check for possible Osteochondral Lesions of the Talus. | 15.27                 | 30.54        | 39.11          | 8.19            | 6.89                     |
| A9. I am willing to have a comprehensive understanding of the emergency treatment and daily management of Osteochondral Lesions of the Talus.                     | 16.95                 | 32.59        | 36.87          | 7.45            | 6.15                     |
