# Supplementary material
Source: HighWire-hosted journal article supplement (https://bmjopen.bmj.com/content/15/4/e087402)
Supplement: inline-supplementary-material-4 [file inline-supplementary-material-4.pdf]

Table S4. Practice Dimension, %

| Items                                                                                                                                   | Always/Strongly Agree | Often/Agree | Sometimes/Neutral | Rarely/Disagree | Never/Strongly Disagree |
|-----------------------------------------------------------------------------------------------------------------------------------------|-----------------------|-------------|-------------------|-----------------|-------------------------|
| P1. I will proactively learn about Osteochondral Lesions of the Talus.                                                                  | 7.82                  | 7.45        | 32.77             | 33.33           | 18.62                   |
| P2. After an ankle injury, I will go to the hospital to check if there is damage to the calcaneal cartilage.                            | 12.66                 | 8.57        | 30.54             | 31.28           | 16.95                   |
| P3. I will try to rest as much as possible to reduce the burden on the ankle and lower the chances of injuring the calcaneal cartilage. | 18.81                 | 20.30       | 28.86             | 20.86           | 11.17                   |
| P4. I will engage in non-weight-bearing exercises as recommended by the doctor after an injury, such as cycling or swimming.            | 16.01                 | 13.78       | 27.93             | 22.53           | 19.74                   |
| P5. I will choose a treatment plan based on medical advice.                                                                             | 32.22                 | 24.39       | 21.79             | 13.59           | 8.01                    |
| P6. I would consider minimally invasive surgery as a treatment option.                                                                  | 11.55                 | 19.93       | 52.89             | 9.87            | 5.77                    |
