# Supplementary material
Source: HighWire-hosted journal article supplement (https://bmjopen.bmj.com/content/15/4/e087402)
Supplement: inline-supplementary-material-5 [file inline-supplementary-material-5.pdf]

| Table S5. Pearson’s Correlation Analysis |                |                |          |
|------------------------------------------|----------------|----------------|----------|
|                                          | Knowledge      | Attitude       | Practice |
| Knowledge                                | 1              |                |          |
| Attitude                                 | 0.076 (0.077)  | 1              |          |
| Practice                                 | 0.382 (<0.001) | 0.220 (<0.001) | 1        |
