# Supplementary material
Source: HighWire-hosted journal article supplement (https://bmjopen.bmj.com/content/15/4/e087402)
Supplement: inline-supplementary-material-7 [file inline-supplementary-material-7.pdf]

Table S7. Univariate Logistic Regression Analysis for Knowledge, Attitude, Practice

| Dimension | Variables                       | Univariate Analysis |             | P      |
|-----------|---------------------------------|---------------------|-------------|--------|
|           |                                 | OR                  | 95% CI      |        |
| Knowledge | Age                             | 1.002               | 0.985-1.018 | 0.845  |
|           | Gender                          |                     |             |        |
|           | Male                            | 0.878               | 0.573-1.329 | 0.545  |
|           | Female                          | Reference           |             |        |
|           | BMI                             | 0.993               | 0.955-1.031 | 0.723  |
|           | Education                       |                     |             |        |
|           | Junior high school or below     | Reference           |             |        |
|           | High school / Vocational school | 1.551               | 0.756-3.220 | 0.233  |
|           | College / Bachelor's degree     | 1.586               | 0.916-2.867 | 0.111  |
|           | Master's degree and above       | 2.333               | 0.764-6.834 | 0.125  |
|           | Ethnicity                       |                     |             |        |
|           | Han ethnicity                   | 1.405               | 0.814-2.531 | 0.238  |
|           | Ethnic minority                 | Reference           |             |        |
|           | Employment                      |                     |             |        |
|           | Employed                        | 1.996               | 1.366-2.922 | <0.001 |
|           | Unemployed                      | Reference           |             |        |
|           | Monthly Per Capita Income, Yuan |                     |             |        |
|           | <2,000                          | Reference           |             |        |
|           | 2,000-5,000                     | 1.687               | 0.856-3.503 | 0.143  |
|           | 5,000-10,000                    | 2.377               | 1.172-5.061 | 0.020  |
|           | >10,000                         | 2.064               | 0.920-4.768 | 0.082  |
|           | Prefer not to disclose          | 0.774               | 0.375-1.661 | 0.497  |
|           | Smoking                         |                     |             |        |
|           | Never smoked                    | Reference           |             |        |
|           | Former smoker                   | 0.569               | 0.271-1.100 | 0.111  |
|           | Current smoker                  | 0.868               | 0.494-1.478 | 0.612  |
|           | Alcohol Consumption             |                     |             |        |
|           | Never consumed alcohol          | Reference           |             |        |

|                                                     |           |             |        |
|-----------------------------------------------------|-----------|-------------|--------|
| Former drinker                                      | 0.821     | 0.473-1.388 | 0.471  |
| Current drinker                                     | 0.668     | 0.421-1.043 | 0.081  |
| <b>Medical Insurance</b>                            |           |             |        |
| Yes                                                 | 1.776     | 1.082-3.020 | 0.028  |
| No                                                  | Reference |             |        |
| <b>Frequent Walking on Uneven Surfaces</b>          |           |             |        |
| Yes                                                 | 1.253     | 0.854-1.834 | 0.247  |
| No                                                  | Reference |             |        |
| <b>Frequent Participation in Sports</b>             |           |             |        |
| Yes                                                 | 1.532     | 1.040-2.251 | 0.030  |
| No                                                  | Reference |             |        |
| <b>History of Ankle Sprains</b>                     |           |             |        |
| Yes                                                 | 1.727     | 1.186-2.519 | 0.004  |
| No                                                  | Reference |             |        |
| <b>UnfixeD Tender Points Around the Ankle Joint</b> |           |             |        |
| With                                                | 1.673     | 1.053-2.647 | 0.028  |
| Without                                             | Reference |             |        |
| Unclear                                             | 0.701     | 0.425-1.132 | 0.154  |
| <b>Severity of Ankle Injury</b>                     |           |             |        |
| Very severe, unable to walk                         | 0.488     | 0.140-1.328 | 0.200  |
| Moderately severe, pain with pressure               | 0.804     | 0.436-1.421 | 0.468  |
| Not very severe, slight pain with pressure          | Reference |             |        |
| <b>Cartilage Injury Of The Talus</b>                |           |             |        |
| Yes                                                 | 1.119     | 0.431-2.744 | 0.809  |
| No                                                  | Reference |             |        |
| Unclear                                             | 0.442     | 0.291-0.662 | <0.001 |
| <b>Recovered From Ankle Injury</b>                  |           |             |        |
| Yes                                                 | 1.571     | 0.892-2.913 | 0.132  |
| No                                                  | Reference |             |        |
| <b>Underlying or Chronic Diseases</b>               |           |             |        |
| Hypertension                                        |           |             |        |
| Yes                                                 | 0.805     | 0.312-1.849 | 0.628  |

|          |                                 |           |             |       |
|----------|---------------------------------|-----------|-------------|-------|
|          | No                              | Reference |             |       |
|          | Hyperlipidemia                  |           |             |       |
|          | Yes                             | 0.977     | 0.139-4.584 | 0.978 |
|          | No                              | Reference |             |       |
|          | Other                           |           |             |       |
|          | Yes                             | 0.956     | 0.446-1.921 | 0.904 |
|          | No                              | Reference |             |       |
|          | None                            |           |             |       |
|          | Yes                             | 1.621     | 1.007-2.686 | 0.053 |
|          | No                              | Reference |             |       |
| Attitude |                                 |           |             |       |
|          | Knowledge                       | 1.042     | 1.003-1.084 | 0.036 |
|          | Age                             | 0.968     | 0.947-0.987 | 0.001 |
|          | Gender                          |           |             |       |
|          | Male                            | 0.596     | 0.377-0.922 | 0.023 |
|          | Female                          | Reference |             |       |
|          | BMI                             | 1.031     | 0.993-1.069 | 0.107 |
|          | Education                       |           |             |       |
|          | Junior high school or below     | Reference |             |       |
|          | High school / Vocational school | 1.589     | 0.742-3.454 | 0.235 |
|          | College / Bachelor's degree     | 2.123     | 1.194-4.000 | 0.014 |
|          | Master's degree and above       | 1.314     | 0.337-4.293 | 0.667 |
|          | Ethnicity                       |           |             |       |
|          | Han ethnicity                   | 1.062     | 0.627-1.858 | 0.828 |
|          | Ethnic minority                 | Reference |             |       |
|          | Employment                      |           |             |       |
|          | Employed                        | 0.637     | 0.424-0.947 | 0.028 |
|          | Unemployed                      | Reference |             |       |
|          | Monthly Per Capita Income, Yuan |           |             |       |
|          | <2,000                          | Reference |             |       |
|          | 2,000-5,000                     | 1.328     | 0.656-2.844 | 0.446 |
|          | 5,000-10,000                    | 1.747     | 0.838-3.832 | 0.148 |

|                                                     |           |             |       |
|-----------------------------------------------------|-----------|-------------|-------|
| >10,000                                             | 1.958     | 0.854-4.632 | 0.117 |
| Prefer not to disclose                              | 1.741     | 0.869-3.701 | 0.131 |
| <b>Smoking</b>                                      |           |             |       |
| Never smoked                                        | Reference |             |       |
| Former smoker                                       | 1.146     | 0.616-2.066 | 0.658 |
| Current smoker                                      | 0.486     | 0.248-0.889 | 0.026 |
| <b>Alcohol Consumption</b>                          |           |             |       |
| Never consumed alcohol                              | Reference |             |       |
| Former drinker                                      | 0.707     | 0.392-1.226 | 0.230 |
| Current drinker                                     | 0.957     | 0.615-1.474 | 0.843 |
| <b>Medical Insurance</b>                            |           |             |       |
| Yes                                                 | 1.234     | 0.769-2.027 | 0.394 |
| No                                                  | Reference |             |       |
| <b>Frequent Walking on Uneven Surfaces</b>          |           |             |       |
| Yes                                                 | 1.281     | 0.871-1.880 | 0.206 |
| No                                                  | Reference |             |       |
| <b>Frequent Participation in Sports</b>             |           |             |       |
| Yes                                                 | 1.335     | 0.902-1.969 | 0.146 |
| No                                                  | Reference |             |       |
| <b>History of Ankle Sprains</b>                     |           |             |       |
| Yes                                                 | 0.873     | 0.593-1.279 | 0.489 |
| No                                                  | Reference |             |       |
| <b>Unfixed Tender Points Around the Ankle Joint</b> |           |             |       |
| With                                                | 0.717     | 0.427-1.175 | 0.196 |
| Without                                             | Reference |             |       |
| Unclear                                             | 0.809     | 0.505-1.276 | 0.369 |
| <b>Severity of Ankle Injury</b>                     |           |             |       |
| Very severe, unable to walk                         | 1.094     | 0.412-2.627 | 0.847 |
| Moderately severe, pain with pressure               | 0.867     | 0.470-1.534 | 0.636 |
| Not very severe, slight pain with pressure          | Reference |             |       |
| <b>Cartilage Injury Of The Talus</b>                |           |             |       |
| With                                                | 0.506     | 0.143-1.411 | 0.231 |

|                 |                                       |           |             |        |
|-----------------|---------------------------------------|-----------|-------------|--------|
|                 | Without                               | Reference |             |        |
|                 | Unclear                               | 0.699     | 0.470-1.032 | 0.074  |
|                 | <b>Recovered From Ankle Injury</b>    |           |             |        |
|                 | Yes                                   | 1.267     | 0.731-2.290 | 0.414  |
|                 | No                                    | Reference |             |        |
|                 | <b>Underlying or Chronic Diseases</b> |           |             |        |
|                 | Hypertension                          |           |             |        |
|                 | Yes                                   | 0.837     | 0.324-1.922 | 0.690  |
|                 | No                                    | Reference |             |        |
|                 | Hyperlipidemia                        |           |             |        |
|                 | Yes                                   | 0.418     | 0.022-2.477 | 0.422  |
|                 | No                                    | Reference |             |        |
|                 | Other                                 |           |             |        |
|                 | Yes                                   | 0.995     | 0.463-1.999 | 0.988  |
|                 | No                                    | Reference |             |        |
|                 | None                                  |           |             |        |
|                 | Yes                                   | 1.031     | 0.656-1.649 | 0.898  |
|                 | No                                    | Reference |             |        |
| <b>Practice</b> |                                       |           |             |        |
|                 | <b>Knowledge</b>                      | 1.145     | 1.096-1.198 | <0.001 |
|                 | <b>Attitude</b>                       | 1.151     | 1.095-1.212 | <0.001 |
|                 | <b>Age</b>                            | 1.000     | 0.982-1.018 | 0.967  |
|                 | <b>Gender</b>                         |           |             |        |
|                 | Male                                  | 0.481     | 0.284-0.785 | 0.005  |
|                 | Female                                | Reference |             |        |
|                 | <b>BMI</b>                            | 0.999     | 0.958-1.040 | 0.969  |
|                 | <b>Education</b>                      |           |             |        |
|                 | Junior high school or below           | Reference |             |        |
|                 | High school / Vocational school       | 1.175     | 0.548-2.524 | 0.677  |
|                 | College / Bachelor's degree           | 1.158     | 0.657-2.136 | 0.623  |
|                 | Master's degree and above             | 2.508     | 0.818-7.392 | 0.097  |
|                 | <b>Ethnicity</b>                      |           |             |        |

|                                                     |           |             |       |
|-----------------------------------------------------|-----------|-------------|-------|
| Han ethnicity                                       | 1.547     | 0.846-3.033 | 0.177 |
| Ethnic minority                                     | Reference |             |       |
| <b>Employment</b>                                   |           |             |       |
| Employed                                            | 1.347     | 0.892-2.026 | 0.154 |
| Unemployed                                          | Reference |             |       |
| <b>Monthly Per Capita Income, Yuan</b>              |           |             |       |
| <2,000                                              | Reference |             |       |
| 2,000-5,000                                         | 1.814     | 0.821-4.448 | 0.162 |
| 5,000-10,000                                        | 3.232     | 1.446-8.010 | 0.007 |
| >10,000                                             | 2.942     | 1.192-7.827 | 0.023 |
| Prefer not to disclose                              | 1.275     | 0.562-3.180 | 0.578 |
| <b>Smoking</b>                                      |           |             |       |
| Never smoked                                        | Reference |             |       |
| Former smoker                                       | 0.423     | 0.171-0.908 | 0.041 |
| Current smoker                                      | 0.544     | 0.271-1.015 | 0.069 |
| <b>Alcohol Consumption</b>                          |           |             |       |
| Never consumed alcohol                              | Reference |             |       |
| Former drinker                                      | 0.587     | 0.308-1.057 | 0.088 |
| Current drinker                                     | 0.510     | 0.300-0.838 | 0.010 |
| <b>Medical Insurance</b>                            |           |             |       |
| Yes                                                 | 1.911     | 1.103-3.501 | 0.027 |
| No                                                  | Reference |             |       |
| <b>Frequent Walking on Uneven Surfaces</b>          |           |             |       |
| Yes                                                 | 0.964     | 0.632-1.458 | 0.863 |
| No                                                  | Reference |             |       |
| <b>Frequent Participation in Sports</b>             |           |             |       |
| Yes                                                 | 0.913     | 0.591-1.394 | 0.678 |
| No                                                  | Reference |             |       |
| <b>History of Ankle Sprains</b>                     |           |             |       |
| Yes                                                 | 1.158     | 0.769-1.737 | 0.481 |
| No                                                  | Reference |             |       |
| <b>Unfixed Tender Points Around the Ankle Joint</b> |           |             |       |

|                                            |           |             |       |
|--------------------------------------------|-----------|-------------|-------|
| With                                       | 0.799     | 0.467-1.331 | 0.400 |
| Without                                    | Reference |             |       |
| Unclear                                    | 0.513     | 0.292-0.868 | 0.016 |
| <b>Severity of Ankle Injury</b>            |           |             |       |
| Very severe, unable to walk                | 0.679     | 0.194-1.855 | 0.491 |
| Moderately severe, pain with pressure      | 0.791     | 0.400-1.466 | 0.477 |
| Not very severe, slight pain with pressure | Reference |             |       |
| <b>Cartilage Injury Of The Talus</b>       |           |             |       |
| With                                       | 2.586     | 1.039-6.369 | 0.037 |
| Without                                    | Reference |             |       |
| Unclear                                    | 0.556     | 0.355-0.860 | 0.009 |
| <b>Recovered from Ankle Injury</b>         |           |             |       |
| Yes                                        | 2.066     | 1.071-4.400 | 0.042 |
| No                                         | Reference |             |       |
| <b>Underlying or Chronic Diseases</b>      |           |             |       |
| Hypertension                               |           |             |       |
| Yes                                        | 1.370     | 0.555-3.085 | 0.465 |
| No                                         | Reference |             |       |
| Others                                     |           |             |       |
| Yes                                        | 1.011     | 0.441-2.110 | 0.979 |
| No                                         | Reference |             |       |
| None                                       | 1.162     | 0.712-1.954 | 0.558 |
